# Supplementary material
Source: publisher figshare collection journal article supplement (https://karger.figshare.com/ndownloader/files/13816070)
Supplement: Supplementary file 1 [file 13816070]

**Supplementary Table 3**. (a) Summary of candidate genes and respective polymorphisms; (b) List of analyzed polymorphisms by source of selection and their main characteristics. A1=minor allele; BP=base pair; CHR=chromosome; LD=linkage disequilibrium; MAF=minor allele frequency.

(a)

| **GENE** | **CHR** | **Imputed variants** | **Variants surviving quality control** | **Analyzed variants** |
| --- | --- | --- | --- | --- |
| ABCB1 | 7 | 924 | 479 | 13 |
| ACN9 | 7 | 127 | 102 | 4 |
| BRUNOL4 | 18 | 883 | 659 | 5 |
| CERKL | 2 | 328 | 288 | 3 |
| KCNE1 | 21 | 209 | 177 | 17 |
| KCNH2 | 7 | 78 | 53 | 9 |
| NOS1AP | 1 | 1615 | 703 | 15 |
| NUBPL | 14 | 1101 | 694 | 4 |

(b)

Niemeijer et al., 2015

| **rsID** | **CHR** | **BP** | **GENE** | **A1** | **MAF** |
| --- | --- | --- | --- | --- | --- |
| rs12143842 | 1 | 162033890 | NOS1AP | T | 0.247 |
| rs10494366 | 1 | 162085685 | NOS1AP | G | 0.318 |
| rs16857031 | 1 | 162112910 | NOS1AP | G | 0.110 |
| rs12029454 | 1 | 162133117 | NOS1AP | A | 0.130 |
| rs4657178 | 1 | 162210610 | NOS1AP | T | 0.234 |
| rs993648 | 2 | 182455994 | CERKL | T | 0.169 |
| rs1045642 | 7 | 87138645 | ABCB1 | G | 0.455 |
| rs2032582 | 7 | 87160618 | ABCB1 | C | 0.468 |
| rs1128503 | 7 | 87179601 | ABCB1 | G | 0.468 |
| rs7142881 | 14 | 32093548 | NUBPL | G | 0.383 |
| rs4799915 | 18 | 34928639 | BRUNOL4 | C | 0.422 |

Tagging

| **rsID** | **CHR** | **BP** | **GENE** | **A1** | **MAF** |
| --- | --- | --- | --- | --- | --- |
| rs6948860 | 7 | 150645023 | KCNH2 | A | 0.052 |
| rs2072413 | 7 | 150647969 | KCNH2 | T | 0.286 |
| rs882156 | 7 | 150653336 | KCNH2 | T | 0.422 |
| rs3807377 | 7 | 150657986 | KCNH2 | G | 0.260 |
| rs7789146 | 7 | 150661409 | KCNH2 | A | 0.201 |
| rs11763131 | 7 | 150668182 | KCNH2 | A | 0.286 |
| rs3778871 | 7 | 150670772 | KCNH2 | C | 0.117 |
| rs748693 | 7 | 150671437 | KCNH2 | G | 0.338 |
| rs3807370 | 7 | 150673314 | KCNH2 | A | 0.442 |
| rs2834485 | 21 | 35819014 | KCNE1 | G | 0.331 |
| rs3453 | 21 | 35819063 | KCNE1 | C | 0.474 |
| rs1547356 | 21 | 35822572 | KCNE1 | A | 0.279 |
| rs928740 | 21 | 35823998 | KCNE1 | C | 0.305 |
| rs2834486 | 21 | 35824602 | KCNE1 | C | 0.227 |
| rs9982464 | 21 | 35826268 | KCNE1 | A | 0.305 |
| rs2070359 | 21 | 35826776 | KCNE1 | A | 0.208 |
| rs2070360 | 21 | 35826828 | KCNE1 | A | 0.078 |
| rs12482909 | 21 | 35829219 | KCNE1 | C | 0.474 |
| rs2000435 | 21 | 35834327 | KCNE1 | C | 0.370 |
| rs8128386 | 21 | 35845645 | KCNE1 | G | 0.344 |
| rs9983904 | 21 | 35848910 | KCNE1 | A | 0.422 |
| rs2834489 | 21 | 35853176 | KCNE1 | C | 0.325 |
| rs2834491 | 21 | 35854858 | KCNE1 | A | 0.084 |
| rs11088286 | 21 | 35863331 | KCNE1 | A | 0.221 |
| rs12626448 | 21 | 35867605 | KCNE1 | T | 0.292 |
| rs4817668 | 21 | 35868622 | KCNE1 | C | 0.487 |
| rs7787376 | 7 | 96746074 | ACN9 | G | 0.409 |
| rs10953203 | 7 | 96767557 | ACN9 | T | 0.240 |
| rs60447150 | 7 | 96769866 | ACN9 | A | 0.156 |
| rs12671685 | 7 | 96806129 | ACN9 | G | 0.175 |

Linkage disequilibrium ≥ 0.2

| **rsID** | **CHR** | **BP** | **GENE** | **A1** | **MAF** | **Candidate SNP** | **R2** |
| --- | --- | --- | --- | --- | --- | --- | --- |
| rs6978925 | 7 | 87137015 | ABCB1 | T | 0.260 | rs1045642 | 0.32 |
| rs1882478 | 7 | 87137018 | ABCB1 | T | 0.299 | 0.37 |
| rs4437575 | 7 | 87139316 | ABCB1 | G | 0.416 | 0.83 |
| rs10808071 | 7 | 87140808 | ABCB1 | G | 0.156 | 0.25 |
| rs1002204 | 7 | 87141497 | ABCB1 | C | 0.487 | 0.79 |
| rs6949448 | 7 | 87141814 | ABCB1 | C | 0.500 | 0.70 |
| rs10808072 | 7 | 87176463 | ABCB1 | G | 0.448 | rs1128503 | 0.91 |
| rs2235035 | 7 | 87179086 | ABCB1 | A | 0.305 | 0.45 |
| rs10918796 | 1 | 162133343 | NOS1AP | C | 0.429 | rs12029454 | 0.25 |
| rs10918797 | 1 | 162133602 | NOS1AP | A | 0.422 | 0.26 |
| rs12084981 | 1 | 162034982 | NOS1AP | C | 0.273 | rs12143842 | 0.42 |
| rs12060997 | 1 | 162112065 | NOS1AP | C | 0.065 | rs16857031 | 0.53 |
| rs10918740 | 1 | 162113887 | NOS1AP | T | 0.338 | 0.29 |
| rs2373586 | 7 | 87157583 | ABCB1 | A | 0.494 | rs2032582 | 0.82 |
| rs4148738 | 7 | 87163049 | ABCB1 | T | 0.481 | 0.70 |
| rs10918951 | 1 | 162208514 | NOS1AP | A | 0.065 | rs4657178 | 0.29 |
| rs4431825 | 1 | 162210471 | NOS1AP | A | 0.474 | 0.40 |
| rs4557949 | 1 | 162210954 | NOS1AP | A | 0.468 | 0.39 |
| rs11582778 | 1 | 162212991 | NOS1AP | G | 0.474 | 0.38 |
| rs4656361 | 1 | 162212999 | NOS1AP | C | 0.240 | 0.96 |
| rs554346 | 18 | 34923786 | BRUNOL4 | G | 0.247 | rs4799915 | 0.40 |
| rs583037 | 18 | 34925308 | BRUNOL4 | T | 0.221 | 0.45 |
| rs605828 | 18 | 34926178 | BRUNOL4 | C | 0.136 | 0.26 |
| rs604760 | 18 | 34928799 | BRUNOL4 | A | 0.182 | 0.31 |
| rs11628819 | 14 | 32092780 | NUBPL | T | 0.279 | rs7142881 | 0.70 |
| rs35334661 | 14 | 32092840 | NUBPL | T | 0.390 | 0.98 |
| rs7155549 | 14 | 32095919 | NUBPL | A | 0.331 | 0.54 |
| rs57655914 | 2 | 182453783 | CERKL | T | 0.110 | rs993648 | 0.63 |
| rs767462 | 2 | 182458014 | CERKL | G | 0.058 | 0.29 |
